# Supplementary material for: AI-based identification of therapeutic agents targeting GPCRs: introducing ligand type classifiers and systems biology
Source: Royal Society of Chemistry journal article supplement (doi:10.1039/d3sc02352d), 2023-01-01
Supplement: d3sc02352d1.pdf [file d3sc02352d1.pdf]

MolPort SIA  
Address: Lacplesa 41  
Rīga, LV-1011, Latvia  
VAT No.: LV40003881547  
www.molport.com

  
**MolPort**

PACKING LIST

**549.**

Packing list: LFF12R5049416

Customer ID: 11445

Issue date: Monday, August 6, 2018

Bill to:

Forschungszentrum Jülich  
F-BK  
52425 Jülich  
Germany  
VAT no. DE122624631

Ship to:

Attn: W50/Elisabeth Bauer  
Forschungszentrum Jülich  
Warenannahme (M-ME) Gebäude 20.05  
Polese 15.19 S179  
Leo-Brandt-Strasse  
52428 Jülich  
Germany  
Phone: +49-2461613037

PO# 45216549

| No | MolPort ID          | Supplier                           | Catalogue no. | Quantity | Box ID |
|----|---------------------|------------------------------------|---------------|----------|--------|
| 1  | MolPort-000-686-300 | Eximed                             | FAM07-00051   | 5 mg     | FO01   |
| 2  | MolPort-000-676-340 | Otava, Ltd.                        | 7017470408    | 5 mg     | FO01   |
| 3  | MolPort-000-677-254 | Otava, Ltd.                        | 7018710852    | 5 mg     | FO01   |
| 4  | MolPort-000-769-610 | Pharmeks, Ltd.                     | PHAR101262    | 2 mg     | FO01   |
| 5  | MolPort-000-415-371 | Vitas-M Laboratory, Ltd.           | STK610353     | 5 mg     | FO01   |
| 6  | MolPort-000-464-571 | Vitas-M Laboratory, Ltd.           | STK816960     | 5 mg     | FO01   |
| 7  | MolPort-000-517-295 | Vitas-M Laboratory, Ltd.           | ST1355030     | 5 mg     | FO01   |
| 8  | MolPort-000-437-073 | Vitas-M Laboratory, Ltd. (Premium) | STK895192     | 5 mg     | FO01   |
| 9  | MolPort-001-005-831 | Vitas-M Laboratory, Ltd. (Premium) | STK136010     | 5 mg     | FO01   |
| 10 | MolPort-001-020-836 | Vitas-M Laboratory, Ltd. (Premium) | STK268019     | 5 mg     | FO01   |
| 11 | MolPort-001-498-328 | Vitas-M Laboratory, Ltd. (Premium) | STK098454     | 5 mg     | FO01   |
| 12 | MolPort-001-598-049 | Vitas-M Laboratory, Ltd. (Premium) | STK277079     | 5 mg     | FO01   |

\*This package contains 12 compounds shipped by TNT AWB# 607564845. Please review the contents of this shipment and contact sales@molport.com about any discrepancies within a week from receipt.

|                                        |               |
|----------------------------------------|---------------|
| Wareneingang M-ME<br>Heimig, Tel. 5040 |               |
| Lieferschein zurück an M-ME            |               |
| 07. Aug. 2018                          |               |
| sachlich richtig gekennzeichnet am:    |               |
| Name in Klarschrift:                   | Unterschrift: |

Pos. ① - ⑫

836 752

Contact us:  
sales@molport.com  
Tel: +371 67790398  
Fax: +371 66117161  
Skype: MolPort

Bank: Swedbank AS  
Address: Balasta dambis 1a, Riga,  
LV-1048, Latvija  
IBAN: LV11HABA0551029918596  
SWIFT: HABALV22

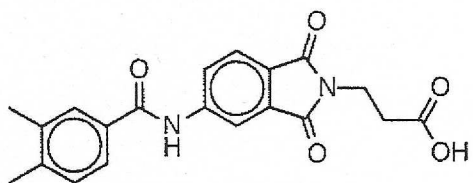

A2AR-JG-001

MolPort-001-598-049

O=C(O)CCN(C1=O)C(=O)c(c12)ccc(c2)NC(=O)c3cc(C)c(C)cc3  
soluble

12

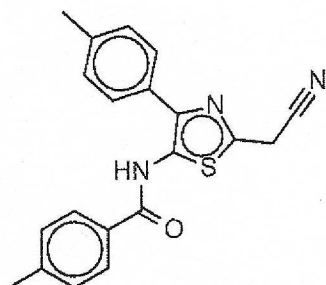

A2AR-JG-002

MolPort-000-464-571

Cc1ccc(cc1)-c2c(sc(n2)CC#N)NC(=O)c3ccc(C)cc3  
soluble

6

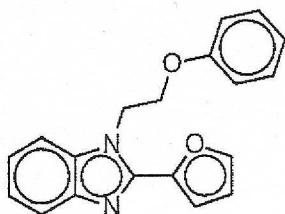

A2AR-JG-003

MolPort-000-437-073

o1cccc1-c(n2)n(c(c23)cccc3)CCOc4ccccc4  
very

8

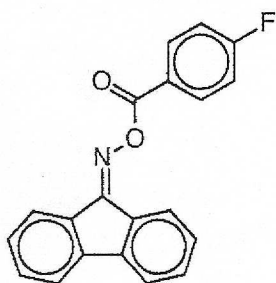

A2AR-JG-004

MolPort-001-498-328

c1cc(F)ccc1C(=O)ON=C(c2cccc3)c(c4c23)cccc4  
poorly

11

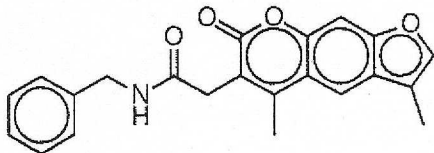

A2AR-JG-005

MolPort-000-686-300

c1cccc1CNC(=O)Cc(c(=O)o2)c(C)c(c3)c2cc(c34)occ4C  
moderately

1

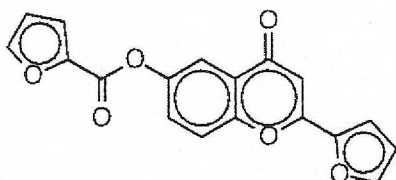

A2AR-JG-006

MolPort-000-677-254

o1cccc1C(=O)Oc(c2)ccc(c23)oc(cc3=O)-c4ccco4  
soluble

3

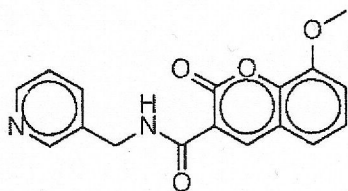

A2AR-JG-007

MolPort-000-517-295

c1cccc1CNC(=O)c(c(=O)o2)cc(c23)cccc3OC  
soluble

7

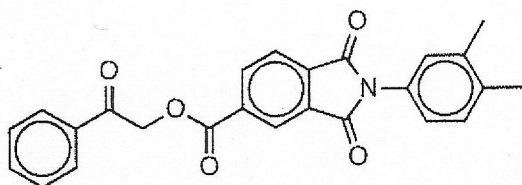

A2AR-JG-008

MolPort-001-020-836

c1cccc1C(=O)COC(=O)c(c2)ccc(c23)C(=O)N  
(C3=O)c(c4)ccc(C)c4C  
moderately

10

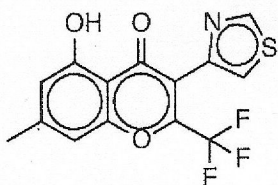

A2AR-JG-009

MolPort-000-769-610

n1csc1-c(c2=O)c(C(F)(F)F)oc(c23)cc(C)cc3O  
insoluble

4

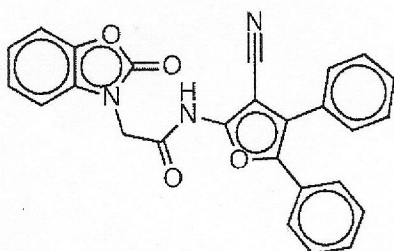

A2AR-JG-010

MolPort-001-005-831

c1cccc1-c(c2C#N)c(-  
c3cccc3)oc2NC(=O)Cn4c(=O)oc(c45)cccc5  
moderately

9

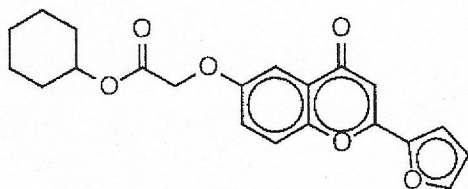

A2AR-JG-011

MolPort-000-676-340

C1CCCCC1OC(=O)COC(c2)ccc(c23)oc(cc3=O)-c4ccco4  
very

2

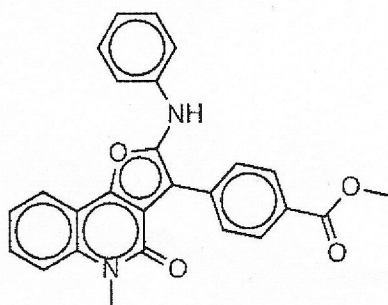

A2AR-JG-012

MolPort-000-415-371

COC(=O)c1ccc(cc1)-  
c2c(Nc3cccc3)oc(c24)c5c(n(C)c4=O)cccc5  
moderately

5
