# Supplementary material for: AI-based identification of therapeutic agents targeting GPCRs: introducing ligand type classifiers and systems biology
Source: Royal Society of Chemistry journal article supplement (doi:10.1039/d3sc02352d), 2023-01-01
Supplement: d3sc02352d2.pdf [file d3sc02352d2.pdf]

## Supporting Information for

### AI-based identification of therapeutic agents targeting GPCRs: introducing ligand type classifiers and systems biology

Jonas Goßen,<sup>1,2†</sup> Rui Pedro Ribeiro,<sup>1†</sup> Dirk Bier,<sup>3</sup> Bernd Neumaier,<sup>3</sup> Paolo Carloni,<sup>1,4</sup> Alejandro Giorgetti,<sup>1,5</sup> Giulia Rossetti<sup>1,6,7\*</sup>

<sup>1</sup>Institute for Computational Biomedicine (INM-9 / IAS-5) Forschungszentrum Jülich

<sup>2</sup>Faculty of Mathematics, Computer Science and Natural Sciences RWTH Aachen University

<sup>3</sup>Institut für Neurowissenschaften und Medizin INM-5: Nuklearchemie Forschungszentrum Jülich

<sup>4</sup>JARA-Institut Molecular Neuroscience and Neuroimaging (INM-11) Forschungszentrum Jülich

<sup>5</sup>Department of Biotechnology University of Verona

<sup>6</sup>Jülich Supercomputing Centre (JSC) Forschungszentrum Jülich

<sup>7</sup>Department of Neurology University Hospital Aachen (UKA), RWTH Aachen University

\*Giulia Rossetti.

**Email:** g.rossetti@fz-juelich.de

#### **This PDF file includes:**

Figures S1 to S8

Tables S1 to S7

Filtering Criteria for Agonist/Antagonist Data

Fig. S1.

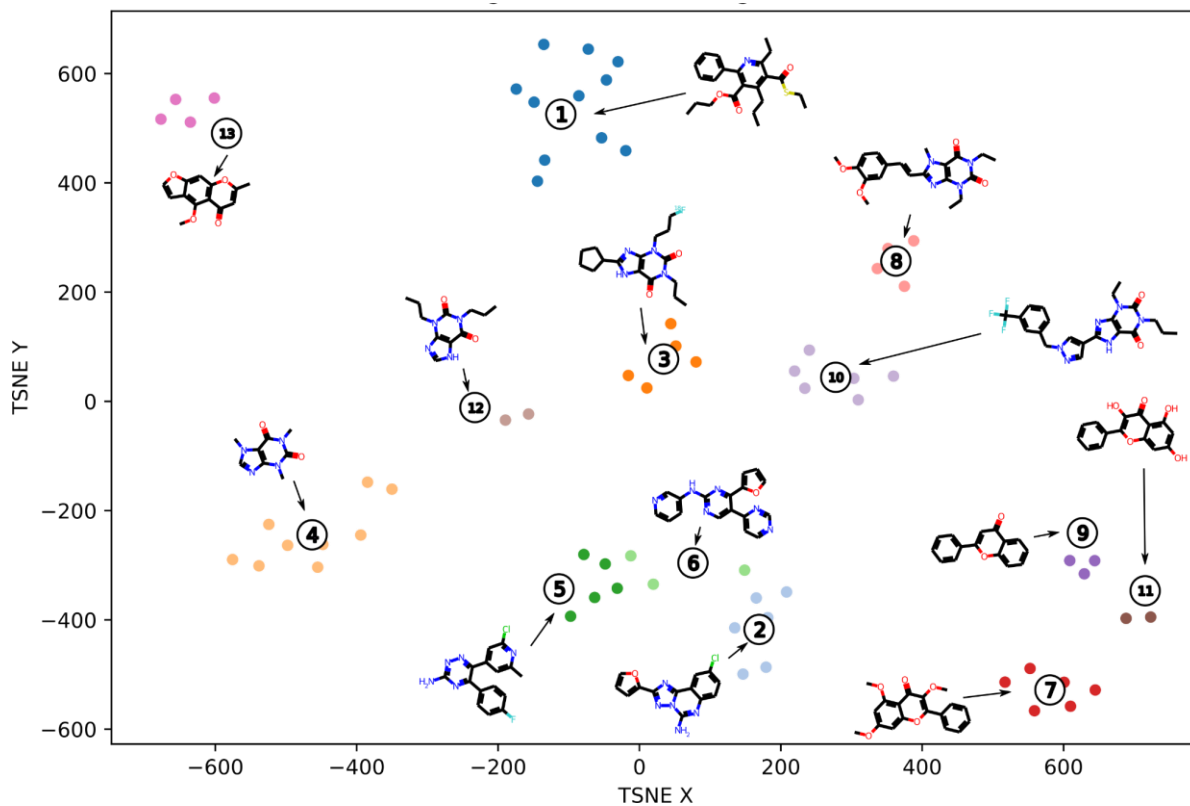

TSNE representation of considered antagonists coming from GtoP, DrugBank and GPCR DB clustered with hierarchical clustering of 13 clusters. Outliers were removed by hand and selected cluster representatives are shown. The chemical space of antagonists is more diverse than that of agonists.

Fig. S2.

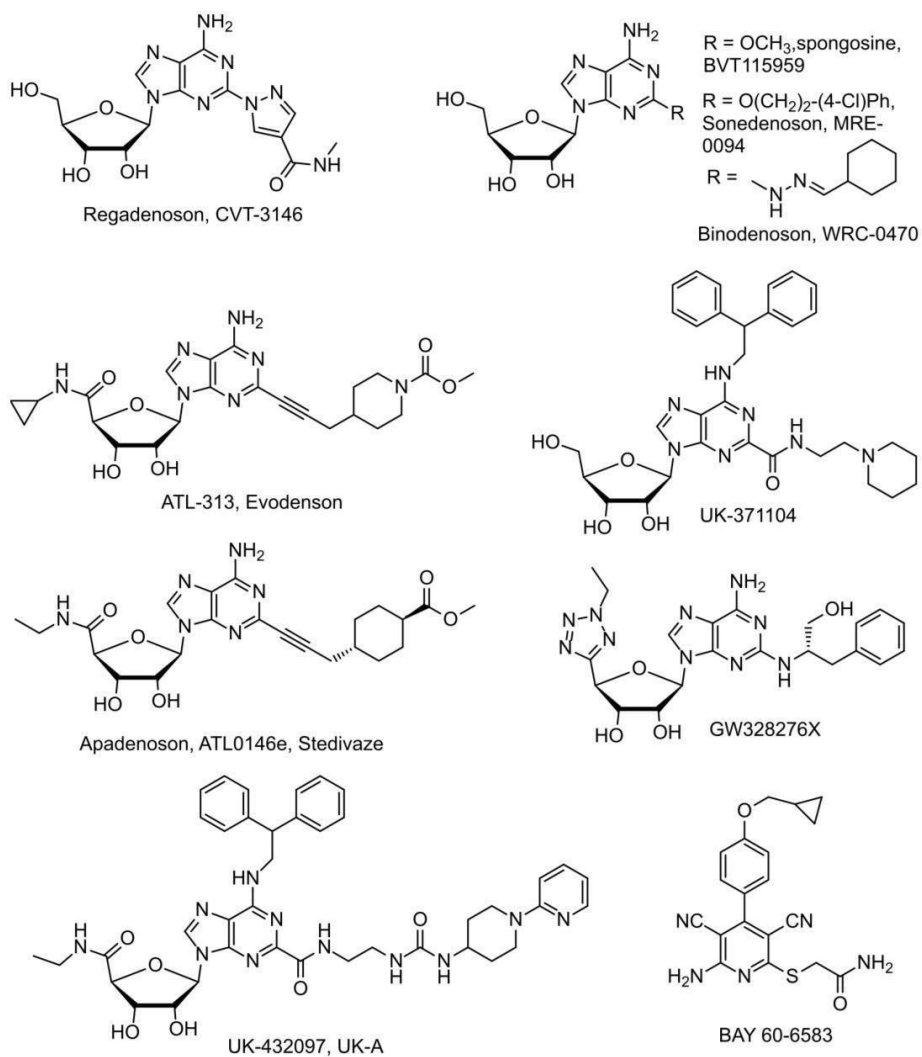

Most of the selective agonists for A<sub>2A</sub> contain a ribose and an adenine-like moiety.

Fig. S3.

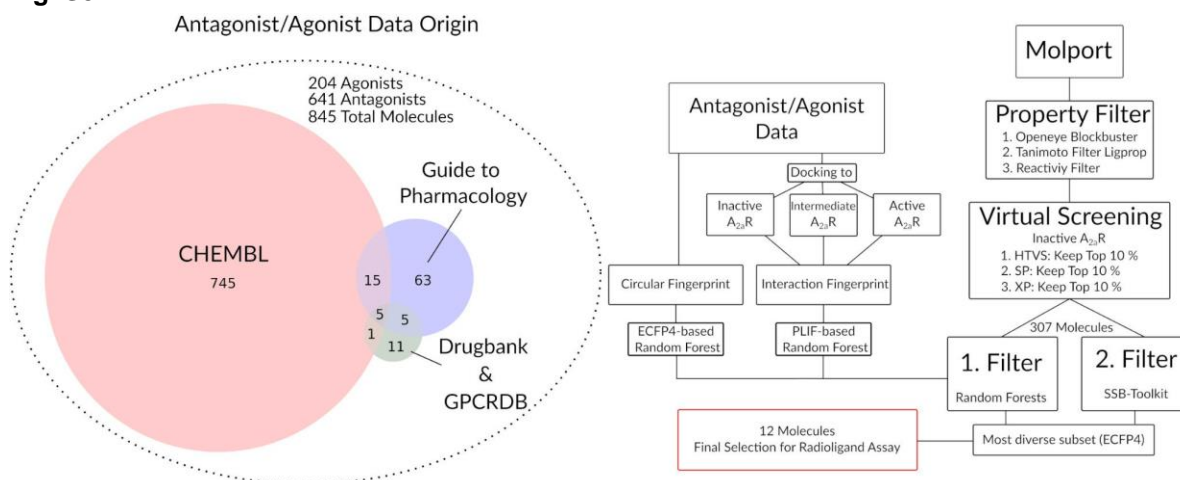

Overview of data collection (left) and overall workflow overview (right).

Fig. S4.

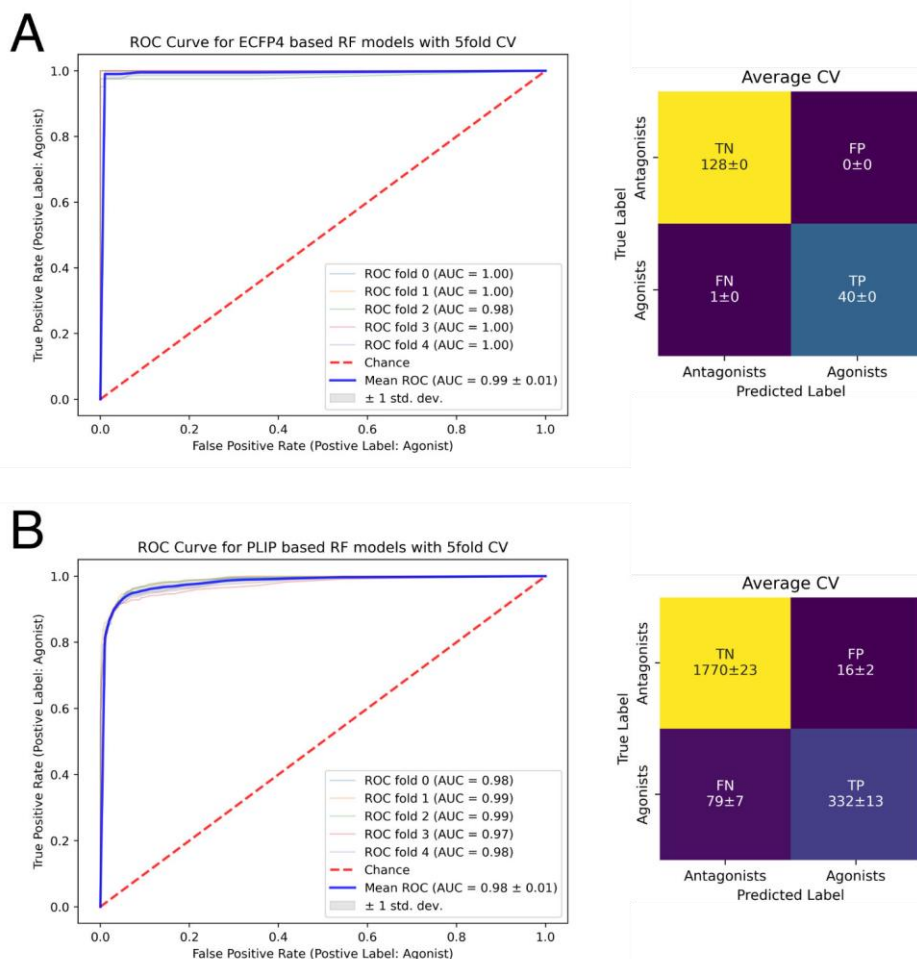

Confusion matrix and ROC plot of (A) ECFP4 based and (B) PLIF based random forest model. Validated by 5-fold-cross validation. In the PLIF Based Random Forest model, the best 5 poses for each unique ligand were considered for the classifier. Therefore, we applied group cross-validation that ensures that no molecule is shared in between training and test splits. For the ECFP4 model every unique molecule in the training sets was used. The classification by the docking-based approach shows a high accuracy score for the respective splits (compare Table SI 3). Although the area under the curve shows a high value of 0.98, a bit lower than our model based upon the chemical ECFP4 fingerprint, the accuracy of both models is still comparable.

**Fig. S5.**

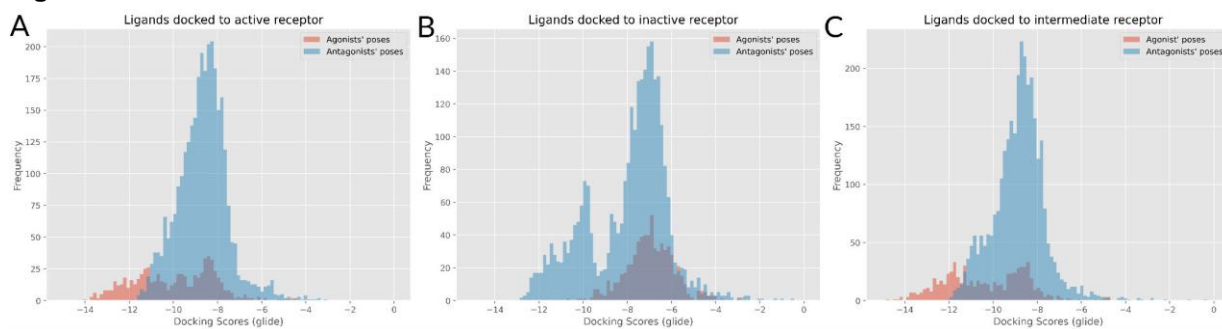

Glide docking scores of the assembled agonist/antagonist library on the three receptors in active(5G53)/inactive(4EIY58)/intermediate(2YDO) conformation. The average agonist binds with a higher score to the A2A in the active state compared to the inactive state.

**Fig. S6.**

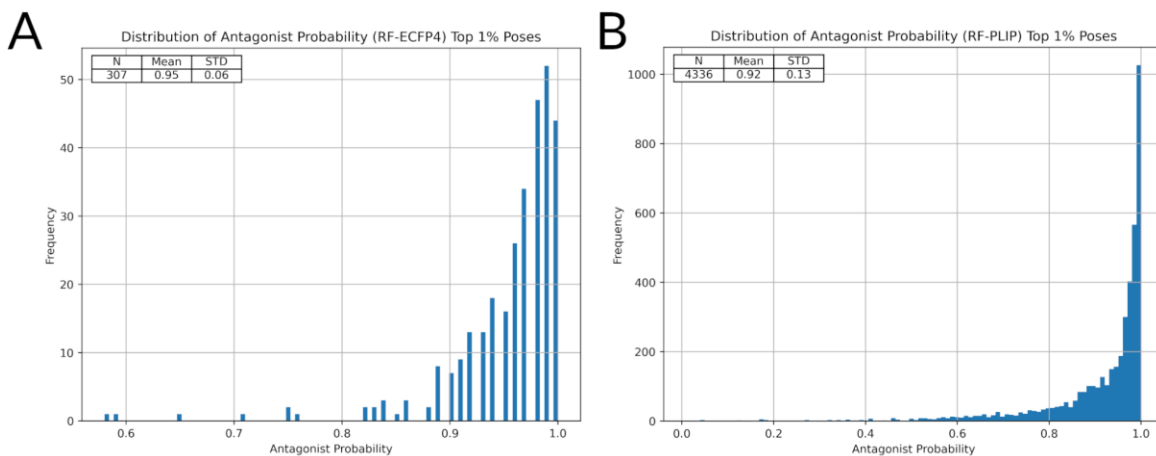

Estimated antagonist probability histograms (100 bins) of top 1% molecules selected by virtual screening to the A2AR. A: ECFP4-based RF classifier B: PLIF-based RF classifier. Number of samples (N), arithmetic mean (Mean) and standard deviation (STD) are given for both distributions.

Fig. S7.

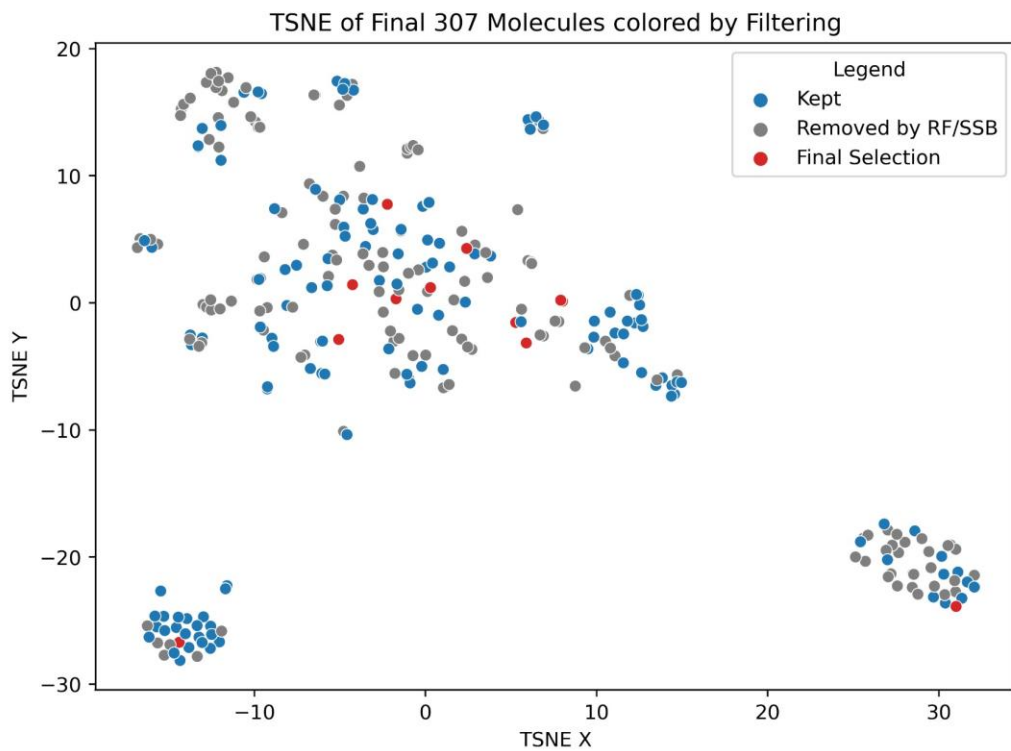

TSNE representation of the 307 molecules identified through virtual screening. Tanimoto similarity was used for the generation of the distance matrix used by the TSNE algorithm. PCA with 50 dimensions was applied.



Fig. S8.

A

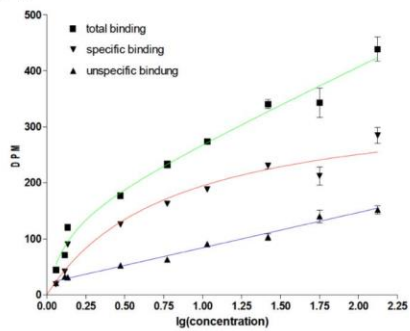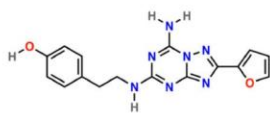

$K_D = 1.33 \pm 0.57$  nM  
 $n = 3$

B

### Binding study

Anova:  $p = 0,1$

$\Rightarrow K_I > \approx 2 \mu\text{M}$

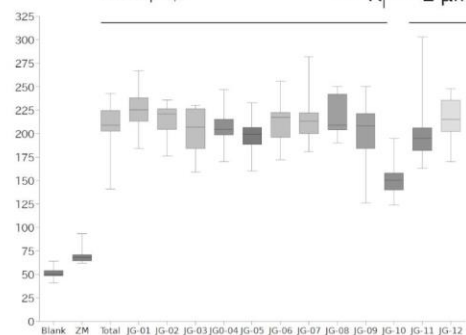

Calibration of assay to gold standard ZMA. (B) Binding study of final 12 selected molecules.

**Table S1.**

| Method  | PDB         | Res. (Å) | State    | Degree active (%) | Name                           | Function          | PDB Date   | Ref. |
|---------|-------------|----------|----------|-------------------|--------------------------------|-------------------|------------|------|
| X-ray   | <b>8CU6</b> | 2.8      | Inactive | 1                 | LJ-4517                        | Antagonist        | 31/08/2022 | 1    |
| X-ray   | 8CU7        | 2.1      | Inactive | 1                 | LJ-4517                        | Antagonist        | 31/08/2022 | 1    |
| X-ray   | <b>8DU3</b> | 2.5      | Inactive | 1                 | 21a                            | Antagonist        | 10/08/2022 | 2    |
| cryo-EM | 7T32        | 3.4      | Inactive | 1                 | ZM-241385                      | Antagonist        | 10/08/2022 | 3    |
| X-ray   | <b>7EZC</b> | 3.8      | Active   | 73                | UK-432,097                     | Agonist           | 13/04/2022 | 4    |
| X-ray   | 7PYR        | 2.6      | Inactive | 1                 | Preladenant conjugate PSB-2115 | Antagonist        | 02/03/2022 | 5    |
| X-ray   | <b>7PX4</b> | 2.3      | Inactive | 1                 | Preladenant conjugate PSB-2113 | Antagonist        | 02/03/2022 | 5    |
| MicroED | 7RM5        | 2.8      | Inactive | 1                 | ZM-241385                      | Antagonist        | 08/09/2021 | 6    |
| X-ray   | <b>7ARO</b> | 3.1      | Inactive | 1                 | ChEMBL124345                   | Agonist (partial) | 07/04/2021 | 7    |
| X-ray   | 6LPK        | 1.8      | Inactive | 1                 | ZM-241385                      | Antagonist        | 25/11/2020 | 8    |
| X-ray   | <b>6LPL</b> | 2.0      | Inactive | 1                 | ZM-241385                      | Antagonist        | 25/11/2020 | 8    |
| X-ray   | 6LPJ        | 1.8      | Inactive | 1                 | ZM-241385                      | Antagonist        | 25/11/2020 | 8    |

|         |             |     |          |     |                                                                          |            |            |    |
|---------|-------------|-----|----------|-----|--------------------------------------------------------------------------|------------|------------|----|
| X-ray   | <b>6WQA</b> | 2.0 | Inactive | 1   | ZM-241385                                                                | Antagonist | 18/11/2020 | 9  |
| X-ray   | 6ZDV        | 2.1 | Inactive | 1   | 2-Methyl-3-(4-methylthiazol-2-yl)-4-oxo-6-propyl-4H-chromen-7-yl acetate | Antagonist | 16/09/2020 | 10 |
| X-ray   | <b>6ZDR</b> | 1.9 | Inactive | 1   | ChEMBL 2030687                                                           | Antagonist | 16/09/2020 | 10 |
| X-ray   | 6S0Q        | 2.7 | Inactive | 1   | ZM-241385                                                                | Antagonist | 15/07/2020 | 11 |
| X-ray   | <b>6S0L</b> | 2.7 | Inactive | 1   | ZM-241385                                                                | Antagonist | 15/07/2020 | 11 |
| X-ray   | 6PS7        | 1.9 | Inactive | 1   | ZM-241385                                                                | Antagonist | 13/11/2019 | 12 |
| X-ray   | <b>6JZH</b> | 2.3 | Inactive | 1   | ZM-241385                                                                | Antagonist | 30/10/2019 | 13 |
| X-ray   | 6GT3        | 2.0 | Inactive | 1   | imaradenant                                                              | Antagonist | 26/06/2019 | 14 |
| X-ray   | <b>6MH8</b> | 4.2 | Inactive | 1   | ZM-241385                                                                | Antagonist | 24/04/2019 | 15 |
| cryo-EM | 6GDG        | 4.1 | Active   | 100 | NECA                                                                     | Agonist    | 16/05/2018 | 16 |
| X-ray   | <b>5WF6</b> | 2.9 | Active   | 73  | UK-432,097                                                               | Agonist    | 21/02/2018 | 17 |
| X-ray   | 5WF5        | 2.6 | Active   | 73  | UK-432,097                                                               | Agonist    | 21/02/2018 | 17 |
| X-ray   | <b>5OLV</b> | 2.0 | Inactive | 1   | ChEMBL 1671936                                                           | Antagonist | 17/01/2018 | 18 |
| X-ray   | 5OLO        | 3.1 | Inactive | 1   | tozadenant                                                               | Antagonist | 17/01/2018 | 18 |

|       |             |     |          |   |                   |            |            |    |
|-------|-------------|-----|----------|---|-------------------|------------|------------|----|
| X-ray | <b>5OM4</b> | 2.0 | Inactive | 1 | ChEMBL<br>2024114 | Antagonist | 17/01/2018 | 18 |
| X-ray | 5OLG        | 1.9 | Inactive | 1 | ZM-241385         | Antagonist | 17/01/2018 | 18 |
| X-ray | <b>5OLZ</b> | 1.9 | Inactive | 1 | ChEMBL<br>2024114 | Antagonist | 17/01/2018 | 18 |
| X-ray | 5OLH        | 2.6 | Inactive | 1 | vipadenant        | Antagonist | 17/01/2018 | 18 |
| X-ray | <b>5OM1</b> | 2.1 | Inactive | 1 | ChEMBL<br>2024114 | Antagonist | 17/01/2018 | 18 |
| X-ray | 6AQF        | 2.5 | Inactive | 1 | ZM-241385         | Antagonist | 10/01/2018 | 19 |
| X-ray | <b>5VRA</b> | 2.4 | Inactive | 1 | ZM-241385         | Antagonist | 13/12/2017 | 20 |
| X-ray | 5NM2        | 2.0 | Inactive | 1 | ZM-241385         | Antagonist | 27/09/2017 | 21 |
| X-ray | <b>5NM4</b> | 1.7 | Inactive | 1 | ZM-241385         | Antagonist | 27/09/2017 | 21 |
| X-ray | 5NLX        | 2.1 | Inactive | 1 | ZM-241385         | Antagonist | 27/09/2017 | 21 |
| X-ray | <b>5MZJ</b> | 2.0 | Inactive | 1 | theophylline      | Antagonist | 26/07/2017 | 22 |
| X-ray | 5MZP        | 2.1 | Inactive | 1 | caffeine          | Antagonist | 26/07/2017 | 22 |
| X-ray | <b>5N2R</b> | 2.8 | Inactive | 1 | PSB36             | Antagonist | 26/07/2017 | 22 |
| X-ray | 5JTB        | 2.8 | Inactive | 1 | ZM-241385         | Antagonist | 31/05/2017 | 23 |
| X-ray | <b>5UVI</b> | 3.2 | Inactive | 1 | ZM-241385         | Antagonist | 24/05/2017 | 24 |

|       |             |     |          |     |                                                                                                                 |            |            |    |
|-------|-------------|-----|----------|-----|-----------------------------------------------------------------------------------------------------------------|------------|------------|----|
| X-ray | 5UIG        | 3.5 | Inactive | 16  | 5-Amino-N-<br>[(2-Methoxyphenyl)methyl]-<br>2-(3-Methylphenyl)-<br>2h-1,2,3-Triazole-4-<br>Carboximide          | Antagonist | 08/02/2017 | 25 |
| X-ray | <b>5K2C</b> | 1.9 | Inactive | 1   | ZM-241385                                                                                                       | Antagonist | 21/09/2016 | 26 |
| X-ray | 5K2A        | 2.5 | Inactive | 1   | ZM-241385                                                                                                       | Antagonist | 21/09/2016 | 26 |
| X-ray | <b>5K2B</b> | 2.5 | Inactive | 1   | ZM-241385                                                                                                       | Antagonist | 21/09/2016 | 26 |
| X-ray | 5K2D        | 1.9 | Inactive | 1   | ZM-241385                                                                                                       | Antagonist | 21/09/2016 | 26 |
| X-ray | <b>5G53</b> | 3.4 | Active   | 100 | NECA                                                                                                            | Agonist    | 03/08/2016 | 27 |
| X-ray | 5IUA        | 2.2 | Inactive | 1   | 2-(Furan-2-yl)-5-N-[3-(4-phenylpiperazin-1-yl)propyl]-1H-[1,2,4]triazolo[1,5-a][1,3,5]triazin-8-ium-5,7-diamine | Antagonist | 29/06/2016 | 28 |
| X-ray | <b>5IU7</b> | 1.9 | Inactive | 1   | 2-(Furan-2-yl)-5-N-[2-(4-phenylpiperidin-1-yl)ethyl]-1H-[1,2,4]triazolo[1,5-a][1,3,5]triazin-8-ium-5,7-diamine  | Antagonist | 29/06/2016 | 28 |
| X-ray | 5IU8        | 2.0 | Inactive | 1   | ChEMBL<br>3934661                                                                                               | Antagonist | 29/06/2016 | 28 |

|       |             |     |          |    |                                    |            |            |    |
|-------|-------------|-----|----------|----|------------------------------------|------------|------------|----|
| X-ray | <b>5IU4</b> | 1.7 | Inactive | 1  | ZM-241385                          | Antagonist | 29/06/2016 | 28 |
| X-ray | 5IUB        | 2.1 | Inactive | 1  | ChEMBL<br>184061                   | Antagonist | 29/06/2016 | 28 |
| X-ray | <b>4UG2</b> | 2.6 | Active   | 73 | CGS 21680                          | Agonist    | 08/04/2015 | 29 |
| X-ray | 4UHR        | 2.6 | Active   | 73 | CGS 21680                          | Agonist    | 08/04/2015 | 29 |
| X-ray | <b>4E1Y</b> | 1.8 | Inactive | 1  | ZM-241385                          | Antagonist | 25/07/2012 | 30 |
| X-ray | 3UZC        | 3.3 | Inactive | 1  | ChEMBL<br>2024114                  | Antagonist | 21/03/2012 | 31 |
| X-ray | <b>3UZA</b> | 3.3 | Inactive | 1  | compound<br>4g [PMID:<br>22220592] | Antagonist | 21/03/2012 | 31 |
| X-ray | 3VG9        | 2.7 | Inactive | 1  | ZM-241385                          | Antagonist | 01/02/2012 | 32 |
| X-ray | <b>3VGA</b> | 3.1 | Inactive | 1  | ZM-241385                          | Antagonist | 01/02/2012 | 32 |
| X-ray | 3PWH        | 3.3 | Inactive | 1  | ZM-241385                          | Antagonist | 07/09/2011 | 33 |
| X-ray | <b>3REY</b> | 3.3 | Inactive | 1  | xanthine<br>amine<br>congener      | Antagonist | 07/09/2011 | 33 |
| X-ray | 3RFM        | 3.6 | Inactive | 1  | caffeine                           | Antagonist | 07/09/2011 | 33 |
| X-ray | <b>2YDO</b> | 3.0 | Active   | 73 | adenosine                          | Agonist    | 18/05/2011 | 34 |
| X-ray | 2YDV        | 2.6 | Active   | 73 | NECA                               | Agonist    | 18/05/2011 | 34 |

|       |             |     |          |    |            |            |            |    |
|-------|-------------|-----|----------|----|------------|------------|------------|----|
| X-ray | <b>3QAK</b> | 2.7 | Active   | 73 | UK-432,097 | Agonist    | 09/03/2011 | 35 |
| X-ray | <b>3EML</b> | 2.6 | Inactive | 1  | ZM-241385  | Antagonist | 14/10/2008 | 36 |

---

Structural A<sub>2a</sub>R Data by Experiment.

Table S2.

**PLIF Based RF Classifier Performance Evaluation Metrics**

| #CV            | test_roc_auc | test_accuracy | test_precision | test_recall | test_f1   |
|----------------|--------------|---------------|----------------|-------------|-----------|
| 1              | 0.98         | 0.96          | 0.97           | 0.82        | 0.89      |
| 2              | 0.98         | 0.95          | 0.97           | 0.76        | 0.85      |
| 3              | 0.99         | 0.97          | 0.94           | 0.88        | 0.90      |
| 4              | 0.99         | 0.96          | 0.97           | 0.83        | 0.90      |
| 5              | 0.97         | 0.95          | 0.94           | 0.79        | 0.86      |
| <b>Average</b> | 0.98±0.01    | 0.96±0.01     | 0.96 ± 0.01    | 0.82±0.02   | 0.88±0.01 |

**ECFP4 Based RF Classifier Performance Evaluation Metrics**

| #CV | test_roc_auc | test_accuracy | test_precision | test_recall | test_f1 |
|-----|--------------|---------------|----------------|-------------|---------|
| 1   | 1.0          | 1.0           | 1.0            | 1.0         | 1.0     |
| 2   | 1.0          | 1.0           | 1.0            | 1.0         | 1.0     |
| 3   | 1.0          | 1.0           | 1.0            | 1.0         | 1.0     |
| 4   | 0.98         | 0.97          | 1.00           | 0.88        | 0.94    |
| 5   | 0.97         | 0.98          | 1.00           | 0.93        | 0.96    |



### PLIF Based RF Classifier Performance Evaluation Metrics

| #CV            | test_roc_auc | test_accuracy | test_precision | test_recall | test_f1   |
|----------------|--------------|---------------|----------------|-------------|-----------|
| 1              | 0.98         | 0.96          | 0.97           | 0.82        | 0.89      |
| 2              | 0.98         | 0.95          | 0.97           | 0.76        | 0.85      |
| 3              | 0.99         | 0.97          | 0.94           | 0.88        | 0.90      |
| 4              | 0.99         | 0.96          | 0.97           | 0.83        | 0.90      |
| 5              | 0.97         | 0.95          | 0.94           | 0.79        | 0.86      |
| <b>Average</b> | 0.98±0.01    | 0.96±0.01     | 0.96 ± 0.01    | 0.82±0.02   | 0.88±0.01 |

### ECFP4 Based RF Classifier Performance Evaluation Metrics

| #CV            | test_roc_auc | test_accuracy | test_precision | test_recall | test_f1   |
|----------------|--------------|---------------|----------------|-------------|-----------|
| <b>Average</b> | 0.99±0.01    | 0.99±0.01     | 1±0            | 0.96±0.03   | 0.98±0.01 |

Selected performance evaluation metrics generated with 5-fold cross-validation. CV types are StratifiedGroupKFold (PLIF) and StratifiedKFold (ECFP4).

**Table S3.**

| <b>ID</b> | <b>ECFP4-RF Antagonist Probability</b> | <b>PLIF-RF Antagonist Probability</b> |
|-----------|----------------------------------------|---------------------------------------|
| JG-001    | 0.92                                   | 0.82                                  |
| JG-002    | 1.00                                   | 0.82                                  |
| JG-003    | 1.00                                   | 0.82                                  |
| JG-004    | 0.90                                   | 0.82                                  |
| JG-005    | 0.94                                   | 0.82                                  |
| JG-006    | 0.99                                   | 0.82                                  |
| JG-007    | 1.00                                   | 0.82                                  |
| JG-008    | 1.00                                   | 0.82                                  |
| JG-009    | 1.00                                   | 0.82                                  |
| JG-010    | 0.98                                   | 0.82                                  |
| JG-011    | 0.96                                   | 0.82                                  |

Predicted probability for the 12 selected compounds to be antagonists according to ECFP4 and PLIF based random forest classifiers.

**Table S4.**\*values obtained with Kdeep trained against the PDBbind v.2016<sup>37</sup>

| Ligand Alias | pKd* | Ki ( $\mu\text{M}$ ) | IC50 ( $\mu\text{M}$ ) | pIC50 |
|--------------|------|----------------------|------------------------|-------|
| JG-01        | 6.5  | 4.0                  | 0.1                    | 7.1   |
| JG-02        | 6.2  | 6.6                  | 0.1                    | 6.9   |
| JG-03        | 5.1  | 94.2                 | 1.8                    | 5.7   |
| JG-04        | 6.0  | 11.5                 | 0.2                    | 6.6   |
| JG-05        | 6.0  | 11.3                 | 0.2                    | 6.7   |
| JG-06        | 5.5  | 35.0                 | 0.7                    | 6.2   |
| JG-07        | 5.8  | 16.8                 | 0.3                    | 6.5   |
| JG-08        | 6.0  | 11.3                 | 0.2                    | 6.7   |
| JG-09        | 5.7  | 24.8                 | 0.5                    | 6.3   |
| JG-10        | 6.8  | 1.7                  | 0.0                    | 7.5   |
| JG-11        | 5.7  | 25.2                 | 0.5                    | 6.3   |

Results obtained from our SB approach applied to the best binding poses of the 12 most promising molecules from the virtual screening towards the A2A receptor.

**Table S5.**

| <b>Title</b> | <b>IFDScore XP</b> | <b>GScore</b> |
|--------------|--------------------|---------------|
| JG-01        | -584.37            | -13.119       |
| JG-02        | -582.49            | -12.961       |
| JG-03        | -579               | -11.454       |
| JG-04        | -580.23            | -12.589       |
| JG-05        | -582.37            | -12.576       |
| JG-06        | -585.58            | -12.314       |
| JG-07        | -581.77            | -11.601       |
| JG-08        | -582.34            | -14.172       |
| JG-09        | -588.98            | -11.241       |
| JG-10        | -585.45            | -14.55        |
| JG-11        | -587.62            | -13.468       |
| JG-12        | -584.22            | -14.474       |

Induced Fit redocking of compounds selected by virtual screening workflow.

**Table S6.**

| Index | Residue | Distance H-A | Hydrogen Bonds |             | Donor Atom | Acceptor Atom |
|-------|---------|--------------|----------------|-------------|------------|---------------|
|       |         |              | Distance D-A   | Donor Angle |            |               |
| 1     | PHE168  | 2.8          | 3.2            | 104.93      | 1246       | 2352 [O2]     |
| 2     | GLU169  | 2.18         | 3.17           | 175.61      | 1257       | 2352 [O2]     |
| 3     | ASN253  | 1.94         | 2.8            | 144.47      | 1863       | 2336 [N1]     |

| Index | Residue | Distance | Pi-Stacking |        | Ligand Atoms                 |
|-------|---------|----------|-------------|--------|------------------------------|
|       |         |          | Angle       | Offset |                              |
| 1     | PHE168  | 3.57     | 8.04        | 0.74   | 2333, 2334, 2337, 2344, 2345 |

| Index | Residue | Hydrophobic Interactions |             |              |
|-------|---------|--------------------------|-------------|--------------|
|       |         | Distance                 | Ligand Atom | Protein Atom |
| 1     | ALA63   | 3.6                      | 2340        | 473          |
| 2     | ILE66   | 3.74                     | 2356        | 495          |
| 3     | VAL84   | 3.48                     | 2341        | 621          |
| 4     | VAL84   | 3.54                     | 2327        | 621          |
| 5     | LEU85   | 3.6                      | 2328        | 629          |
| 6     | PHE168  | 3.88                     | 2332        | 1256         |
| 7     | LEU249  | 3.32                     | 2331        | 1829         |
| 8     | LEU267  | 3.96                     | 2359        | 1971         |

|    |        |      |      |      |
|----|--------|------|------|------|
| 9  | TYR271 | 3.78 | 2357 | 2011 |
| 10 | TYR271 | 3.57 | 2358 | 2009 |
| 11 | ILE274 | 3.71 | 2343 | 2033 |
| 12 | ILE274 | 3.81 | 2359 | 2035 |

---

Summary of polar and non-polar contacts of JG-10 in the induced-fit pose.

**Table S7.**

| ID  | T <sub>c</sub> | Molecule                                                                            | Most-similar in ChEMBL                                                              | ID   | T <sub>c</sub> | Molecule                                                                              | Most-similar in ChEMBL                                                                |
|-----|----------------|-------------------------------------------------------------------------------------|-------------------------------------------------------------------------------------|------|----------------|---------------------------------------------------------------------------------------|---------------------------------------------------------------------------------------|
| [1] | 0.35           | 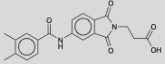   |    | [7]  | 0.67           |    |    |
| [2] | 0.47           |    |    | [8]  | 0.31           |    |    |
| [3] | 0.48           |    |    | [9]  | 0.35           |    |    |
| [4] | 0.27           |   |   | [10] | 0.33           |   |   |
| [5] | 0.37           |  |  | [11] | 0.33           |  |  |
| [6] | 0.35           |  |  | [12] | 0.36           |  |  |

Tanimoto Similarity Score of candidates selected for experimental testing comparison to most similar known A2A binders found in ChEMBL database <sup>38</sup>

## Filtering Criteria for Agonist/Antagonist Data

For the extraction and filtering we used the following criteria for the databases:

1. ChEMBL. Version: ChEMBL29 (Downloaded July 2021)  
Filtering as follows for finding agonists. Excluded molecules according to these criteria were called antagonists.
    - a. assay\_type: "F" (Functional)
    - b. standard\_relation: "="
    - c. Value: >0
    - d. Assay description contains: 'Agonist activity'
    - e. Assay description does not contain any of the following substrings: 'Antagonist activity', 'Antagonistic activity', 'Antagonist potency', 'Inverse agonist', 'Inhibition of human', 'Relaxant activity', 'Inhibition of the effects of NECA', 'Inhibition of 1', 'Binding affinity to human'
  2. DrugBank. Target Adenosine receptor A<sub>2A</sub>, action criterium "agonist, antagonist or inhibitor" (Downloaded on 02.08.2021)
  3. GuideToPharmacology. Target: A<sub>2A</sub> receptor (Agonist and Antagonist Tables) (Downloaded on 03.08.2021)
- GPCRDB. Target: A<sub>2a</sub>R, Mechanism of Action: Agonist/Antagonist, (Downloaded on 03.08.2021)

Duplicates were removed with Schrödingers "unique\_smiles" utility program.



## References

- 1 A. Shiriaeva, D. Park, G. Kim, Y. Lee, X. Hou, D. B. Jarhad, G. Kim, J. Yu, Y. E. Hyun, W. Kim, Z.-G. Gao, K. A. Jacobson, G. W. Han, R. C. Stevens, L. S. Jeong, S. Choi and V. Cherezov, *J. Med. Chem.*, DOI:10.1021/acs.jmedchem.2c00462.
- 2 R. Bolteau, R. Duroux, A. Laversin, B. Vreulz, A. Shiriaeva, B. Stauch, G. W. Han, V. Cherezov, N. Renault, A. Barczyk, S. Ravez, M. Coevoet, P. Melnyk, M. Liberelle and S. Yous, *European Journal of Medicinal Chemistry*, 2022, **241**, 114620.
- 3 K. Zhang, H. Wu, N. Hoppe, A. Manglik and Y. Cheng, *Nat Commun*, 2022, **13**, 4366.
- 4 M. Cui, Q. Zhou, Y. Xu, Y. Weng, D. Yao, S. Zhao and G. Song, *IUCrJ*, 2022, **9**, 333–341.
- 5 T. Claff, T. A. Klapschinski, U. K. Tiruttani Subhramanyam, V. J. Vaaßen, J. G. Schlegel, C. Vielmuth, J. H. Voß, J. Labahn and C. E. Müller, *Angew Chem Int Ed Engl*, 2022, **61**, e202115545.
- 6 M. W. Martynowycz, A. Shiriaeva, X. Ge, J. Hattne, B. L. Nannenga, V. Cherezov and T. Gonen, *Proc Natl Acad Sci U S A*, 2021, **118**, e2106041118.
- 7 T. Amelia, J. P. D. van Veldhoven, M. Falsini, R. Liu, L. H. Heitman, G. J. P. van Westen, E. Segala, G. Verdon, R. K. Y. Cheng, R. M. Cooke, D. van der Es and A. P. IJzerman, *J Med Chem*, 2021, **64**, 3827–3842.
- 8 K. Ihara, M. Hato, T. Nakane, K. Yamashita, T. Kimura-Someya, T. Hosaka, Y. Ishizuka-Katsura, R. Tanaka, T. Tanaka, M. Sugahara, and others, *Scientific reports*, 2020, **10**, 1–12.
- 9 M.-Y. Lee, J. Geiger, A. Ishchenko, G. W. Han, A. Barty, T. A. White, C. Gati, A. Batyuk, M. S. Hunter, A. Aquila, and others, *IUCrJ*.
- 10 W. Jespers, G. Verdon, J. Azuaje, M. Majellaro, H. Keränen, X. García-Mera, M. Congreve, F. Deflorian, C. de Graaf, A. Zhukov, and others, *Angewandte Chemie International Edition*, 2020, **59**, 16536–16543.
- 11 K. Nass, R. Cheng, L. Vera, A. Mozzanica, S. Redford, D. Ozerov, S. Basu, D. James, G. Knopp, C. Cirelli, and others, *IUCrJ*.
- 12 A. Ishchenko, B. Stauch, G. W. Han, A. Batyuk, A. Shiriaeva, C. Li, N. Zatsepin, U. Weierstall, W. Liu, E. Nango, and others, *IUCrJ*, 2019, **6**, 1106–1119.
- 13 Y. Shimazu, K. Tono, T. Tanaka, Y. Yamanaka, T. Nakane, C. Mori, K. Terakado Kimura, T. Fujiwara, M. Sugahara, R. Tanaka, and others, *Journal of applied crystallography*, 2019, **52**, 1280–1288.
- 14 A. Borodovsky, C. M. Barbon, Y. Wang, M. Ye, L. Prickett, D. Chandra, J. Shaw, N. Deng, K. Sachsenmeier, J. D. Clarke, and others, *Journal for immunotherapy of cancer*.
- 15 J. M. Martin-Garcia, L. Zhu, D. Mendez, M.-Y. Lee, E. Chun, C. Li, H. Hu, G. Subramanian, D. Kissick, C. Ogata, and others, *IUCrJ*, 2019, **6**, 412–425.
- 16 J. García-Nafría, Y. Lee, X. Bai, B. Carpenter and C. G. Tate, *Elife*, 2018, **7**, e35946.
- 17 K. L. White, M. T. Eddy, Z.-G. Gao, G. W. Han, T. Lian, A. Deary, N. Patel, K. A. Jacobson, V. Katritch and R. C. Stevens, *Structure*, 2018, **26**, 259–269.
- 18 P. Rucktooa, R. K. Cheng, E. Segala, T. Geng, J. C. Errey, G. A. Brown, R. M. Cooke, F. H. Marshall and A. S. Doré, *Scientific reports*, 2018, **8**, 1–7.
- 19 M. T. Eddy, M.-Y. Lee, Z.-G. Gao, K. L. White, T. Didenko, R. Horst, M. Audet, P. Stanczak, K. M. McClary, G. W. Han, and others, *Cell*, 2018, **172**, 68–80.
- 20 J. Broecker, T. Morizumi, W.-L. Ou, V. Klingel, A. Kuo, D. J. Kissick, A. Ishchenko, M.-Y. Lee, S. Xu, O. Makarov, and others, *Nature protocols*, 2018, **13**, 260–292.
- 21 T. Weinert, N. Olieric, R. Cheng, S. Brünle, D. James, D. Ozerov, D. Gashi, L. Vera, M. Marsh, K. Jaeger, and others, *Nature communications*, 2017, **8**, 1–11.
- 22 R. K. Cheng, E. Segala, N. Robertson, F. Deflorian, A. S. Doré, J. C. Errey, C. Fiez-Vandal, F. H. Marshall and R. M. Cooke, *Structure*, 2017, **25**, 1275–1285.
- 23 I. Melnikov, V. Polovinkin, K. Kovalev, I. Gushchin, M. Shevtsov, V. Shevchenko, A. Mishin, A. Alekseev, F. Rodriguez-Valera, V. Borshchevskiy, and others, *Science advances*, 2017, **3**, e1602952.
- 24 J. M. Martin-Garcia, C. E. Conrad, G. Nelson, N. Stander, N. A. Zatsepin, J. Zook, L. Zhu, J. Geiger, E. Chun, D. Kissick, and others, *IUCrJ*, 2017, **4**, 439–454.

- 25 B. Sun, P. Bachhawat, M. L.-H. Chu, M. Wood, T. Ceska, Z. A. Sands, J. Mercier, F. Lebon, T. S. Kobilka and B. K. Kobilka, *Proceedings of the National Academy of Sciences*, 2017, **114**, 2066–2071.
- 26 A. Batyuk, L. Galli, A. Ishchenko, G. W. Han, C. Gati, P. A. Popov, M.-Y. Lee, B. Stauch, T. A. White, A. Barty, and others, *Science advances*, 2016, **2**, e1600292.
- 27 B. Carpenter, R. Nehmé, T. Warne, A. G. Leslie and C. G. Tate, *Nature*, 2016, **536**, 104–107.
- 28 E. Segala, D. Guo, R. K. Cheng, A. Bortolato, F. Deflorian, A. S. Doré, J. C. Errey, L. H. Heitman, A. P. IJzerman, F. H. Marshall, and others, *Journal of medicinal chemistry*, 2016, **59**, 6470–6479.
- 29 G. Lebon, P. C. Edwards, A. G. Leslie and C. G. Tate, *Molecular pharmacology*, 2015, **87**, 907–915.
- 30 W. Liu, E. Chun, A. A. Thompson, P. Chubukov, F. Xu, V. Katritch, G. W. Han, C. B. Roth, L. H. Heitman, A. P. IJzerman, V. Cherezov and R. C. Stevens, *Science*, 2012, **337**, 232–236.
- 31 M. Congreve, S. P. Andrews, A. S. Doré, K. Hollenstein, E. Hurrell, C. J. Langmead, J. S. Mason, I. W. Ng, B. Tehan, A. Zhukov, and others, *Journal of medicinal chemistry*, 2012, **55**, 1898–1903.
- 32 T. Hino, T. Arakawa, H. Iwanari, T. Yurugi-Kobayashi, C. Ikeda-Suno, Y. Nakada-Nakura, O. Kusano-Arai, S. Weyand, T. Shimamura, N. Nomura, and others, *Nature*, 2012, **482**, 237–240.
- 33 A. S. Doré, N. Robertson, J. C. Errey, I. Ng, K. Hollenstein, B. Tehan, E. Hurrell, K. Bennett, M. Congreve, F. Magnani, and others, *Structure*, 2011, **19**, 1283–1293.
- 34 G. Lebon, T. Warne, P. C. Edwards, K. Bennett, C. J. Langmead, A. G. Leslie and C. G. Tate, *Nature*, 2011, **474**, 521–525.
- 35 F. Xu, H. Wu, V. Katritch, G. Han, K. Jacobson, Z. Gao, V. Cherezov and R. Stevens, *Science*, 2011, **332**, 322–327.
- 36 V.-P. Jaakola, M. T. Griffith, M. A. Hanson, V. Cherezov, E. Y. Chien, J. R. Lane, A. P. IJzerman and R. C. Stevens, *Science*, 2008, **322**, 1211–1217.
- 37 J. Jiménez, M. Škalič, G. Martínez-Rosell and G. De Fabritiis, *J. Chem. Inf. Model.*, 2018, **58**, 287–296.
- 38 A. Gaulton, A. Hersey, M. Nowotka, A. P. Bento, J. Chambers, D. Mendez, P. Mutowo, F. Atkinson, L. J. Bellis, E. Cibrián-Uhalte, M. Davies, N. Dedman, A. Karlsson, M. P. Magariños, J. P. Overington, G. Papadatos, I. Smit and A. R. Leach, *Nucleic Acids Research*, 2016, **45**, D945–D954.
